# Supplementary material for: A triterpenoid from wild bitter gourd inhibits breast cancer cells
Source: PubMed Central journal article supplement (PMC4772478; doi:10.1038/srep22419), 2016-03-01

## SUPPORTING INFORMATION

### **A triterpenoid from wild bitter gourd inhibits breast cancer cells**

Li-Yuan Bai<sup>1,2</sup>, Chang-Fang Chiu<sup>2,3</sup>, Po-Chen Chu<sup>4,5</sup>, Wei-Yu Lin<sup>6</sup>, Shih-Jiuan Chiu<sup>7</sup>,  
and Jing-Ru Weng<sup>8,\*</sup>

<sup>1</sup>Division of Hematology and Oncology, Department of Internal Medicine; <sup>2</sup>Cancer Center, China Medical University Hospital, Taichung 404, Taiwan, <sup>3</sup>College of Medicine, China Medical University, Taichung 404, Taiwan, <sup>4</sup>Institute of Biological Chemistry, Academia Sinica, Taipei 115, Taiwan, <sup>5</sup>Institute of Basic Medical Sciences, College of Medicine, National Cheng Kung University, Tainan 701, Taiwan, <sup>6</sup>Department of Pharmacy, Kinmen Hospital, Kinmen 891, Taiwan, <sup>7</sup>School of Pharmacy, Taipei Medical University, Taipei 110, Taiwan, <sup>8</sup>Department of Biological Science and Technology, China Medical University, Taichung 404, Taiwan

## Figure Legends

**Fig. S1.** TCD induces apoptosis without increment of PPAR $\gamma$  activity in MDA-MB-231 cells. (A) The dose-dependent effect of TCD on annexin V/PI staining of MDA-MB-231 cells at 72 h. (B) The histogram showing the dose-dependent effect of TCD in MDA-MB-231 cells is representative of three independent experiments. Points, mean; bars, S.D. (n = 3). \**P* < 0.05 compared to the control group. (C) The effect of TCD on PARP cleavage and caspase-9 activation in MDA-MB-231 cells after 72 h exposure. (D) The percentage of apoptotic cells of MDA-MB-231 which was treated with DMSO, or TCD (30  $\mu$ M) 72 h with or without pre-treatment of 20  $\mu$ M Z-VAD(OMe)-FMK (Z-VAD) (n = 3). The apoptotic cells were cells with annexin V positive cells in flow cytometric analysis. \**P* < 0.05. (E) Effect of TCD on PPAR $\gamma$  activation in MDA-MB-231 cells. Cells were transfected with PPRE x3-TK-Luc and Renilla plasmids for 24 h before treatment with TCD for 24 h. Data are expressed as the fold change of PPAR $\gamma$  activity in each situation compared to the control. Troglitazone (Trog.) was used as positive control. Values are means  $\pm$  S.E.M. of three independent experiments. \**P*, 0.05 compared to the control group.

**Fig. S2.** Western blotting analysis of TCD on apoptosis-related biomarkers and HDAC activity in MDA-MB-231 cells. (A) Dose-dependent of TCD on the

phosphorylation and protein expression of Akt, NF- $\kappa$ B, p53, ER $\alpha$  and ER $\beta$ . Cells were treated with TCD in 5% FBS-supplemented DMEM/F12 medium for 72h. (B) Effects of TCD on acetyl Histone H3 and HDACs protein expression. (C) TCD inhibited HDAC activity in MDA-MB-231 cells. After treated with DMSO or TCD (25  $\mu$ M) for 72 h, nuclear extract was used to assess HDAC activity as described in Materials and Methods. (n = 3).

**Fig. S3.** TCD induced reactive oxygen species (ROS) generation in MDA-MB-231 cells. Left panel, cells were treated with DMSO or 25  $\mu$ M TCD with or without glutathione (GLU) for 72 h. Right panel, histogram of ROS production of MDA-MB-231 cells treated with DMSO or TCD with or without GLU for 72 h (n = 3). \* $P < 0.05$ ; \*\* $P < 0.01$ .

**Fig. S4.** Dose-dependent effects of TCD on the expression of LC3B-II in MDA-MB-231 cells at 72 h.

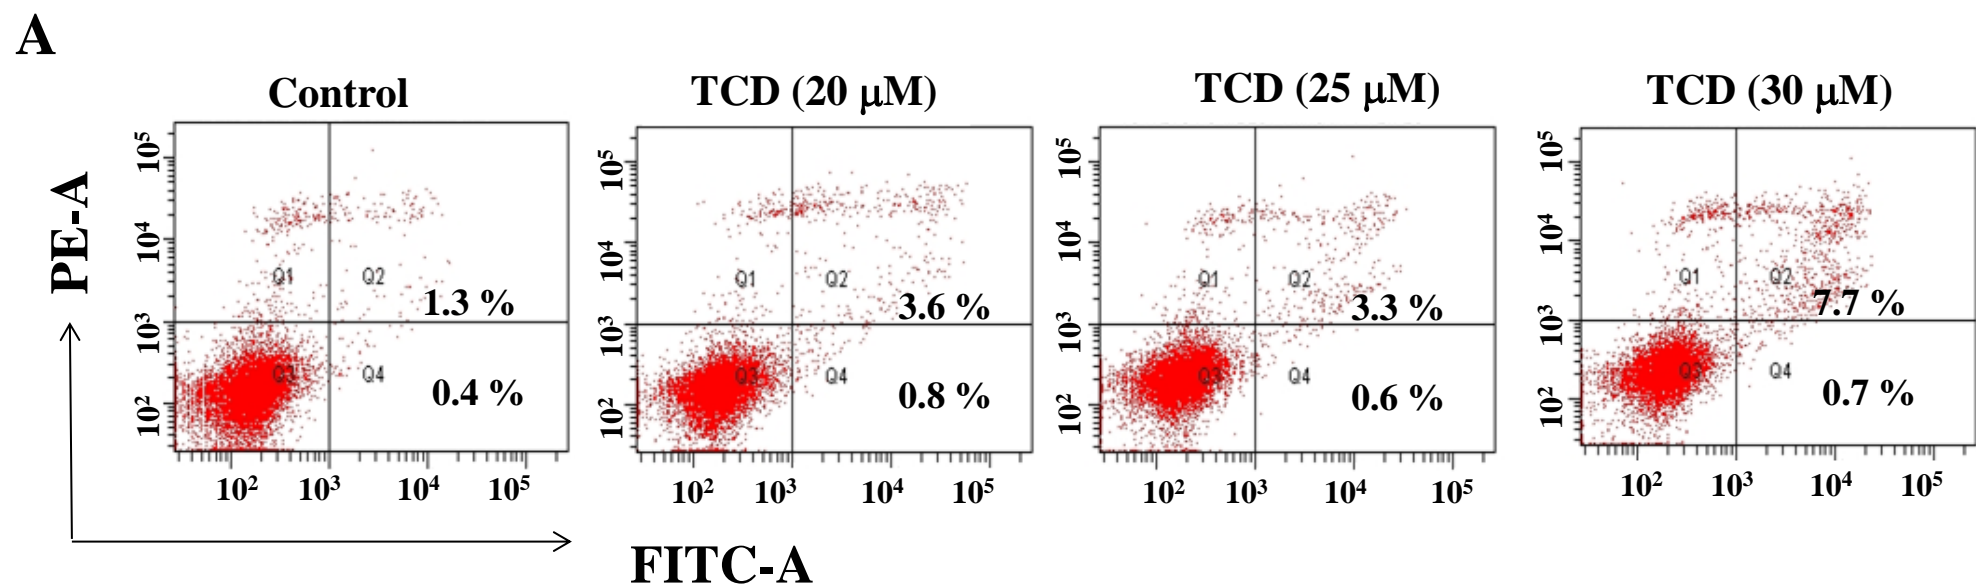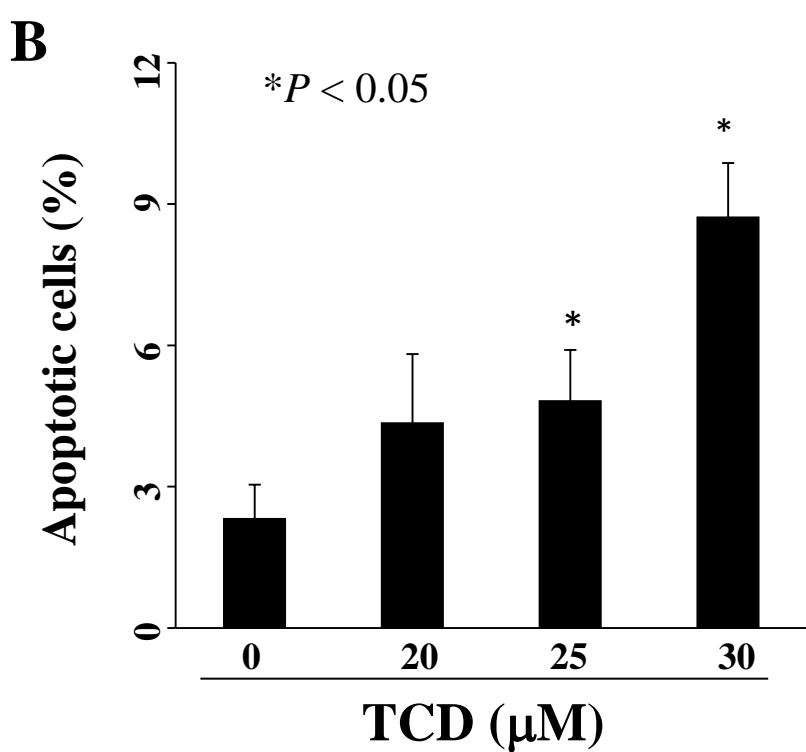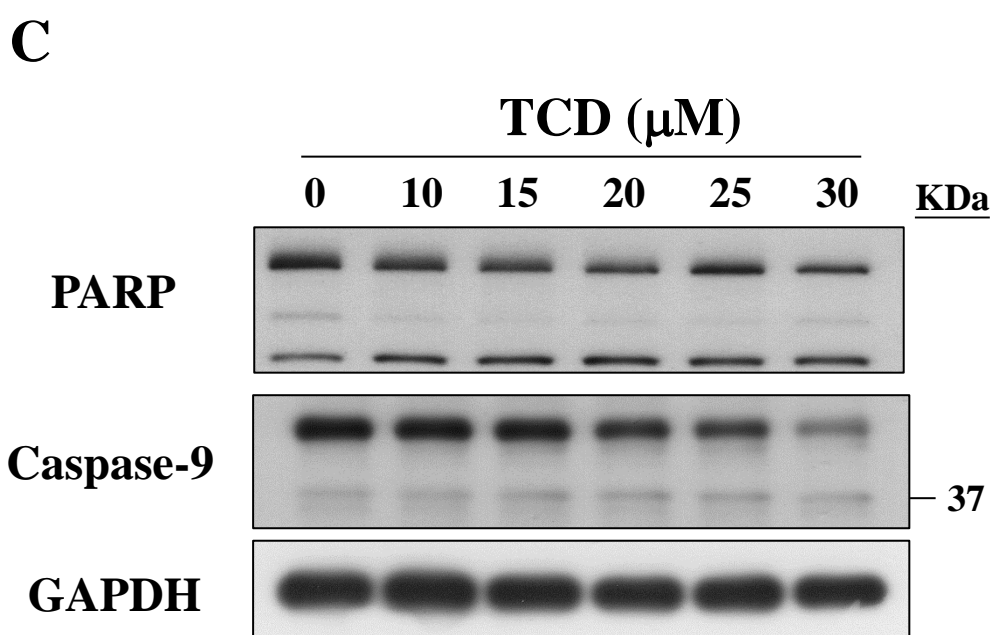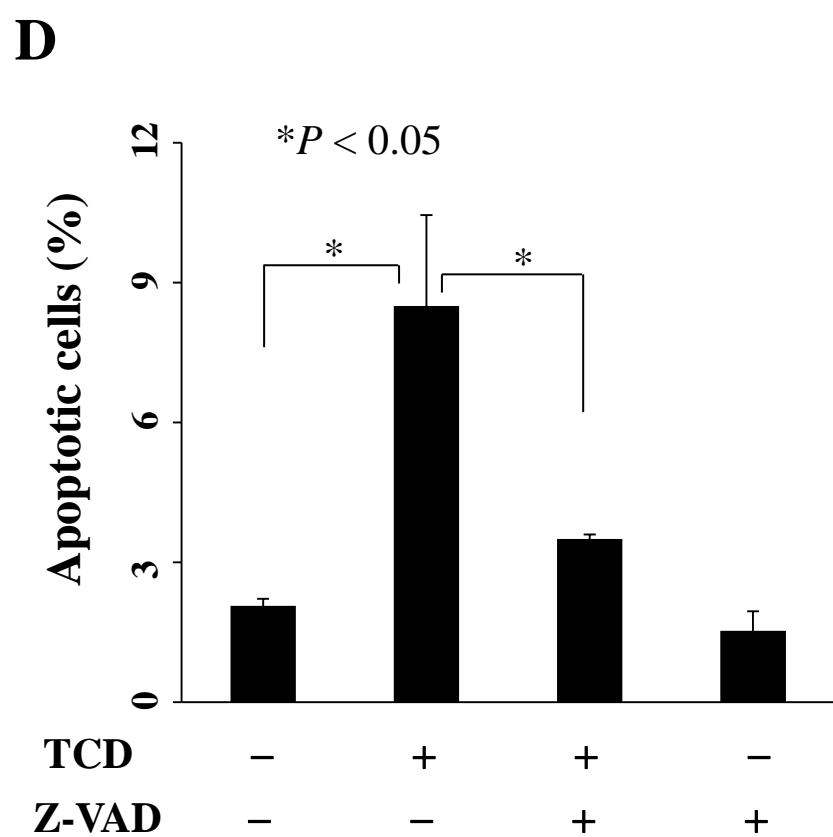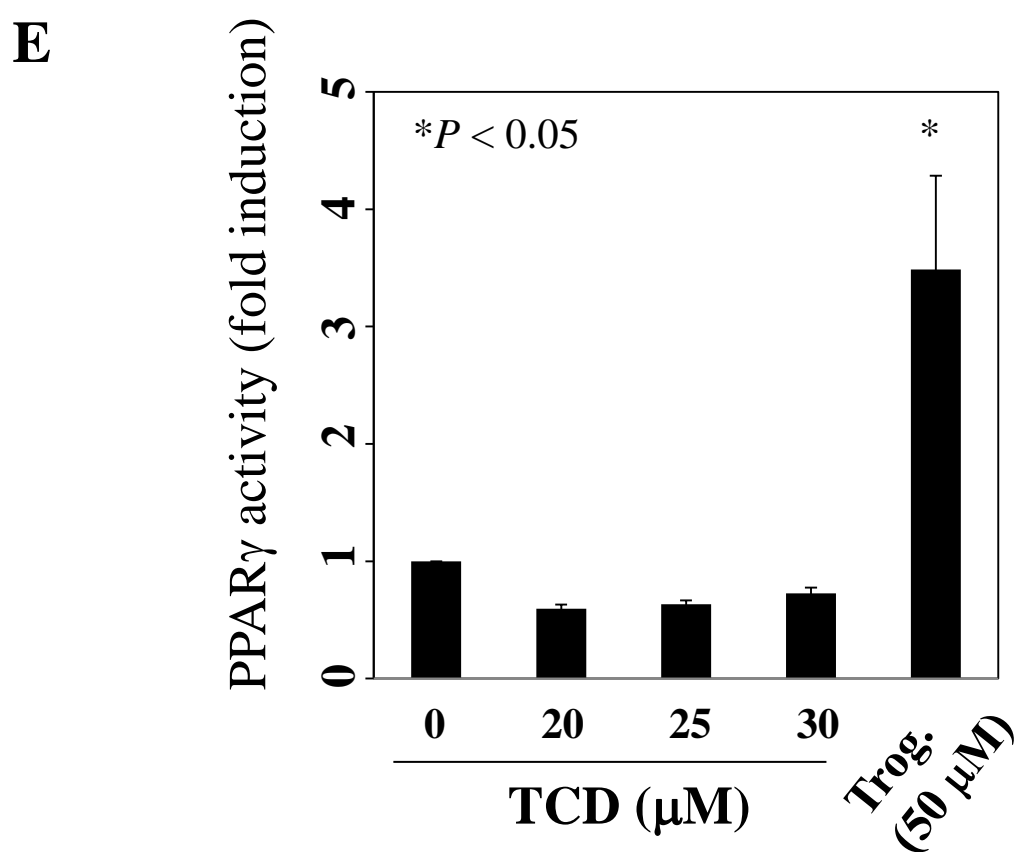

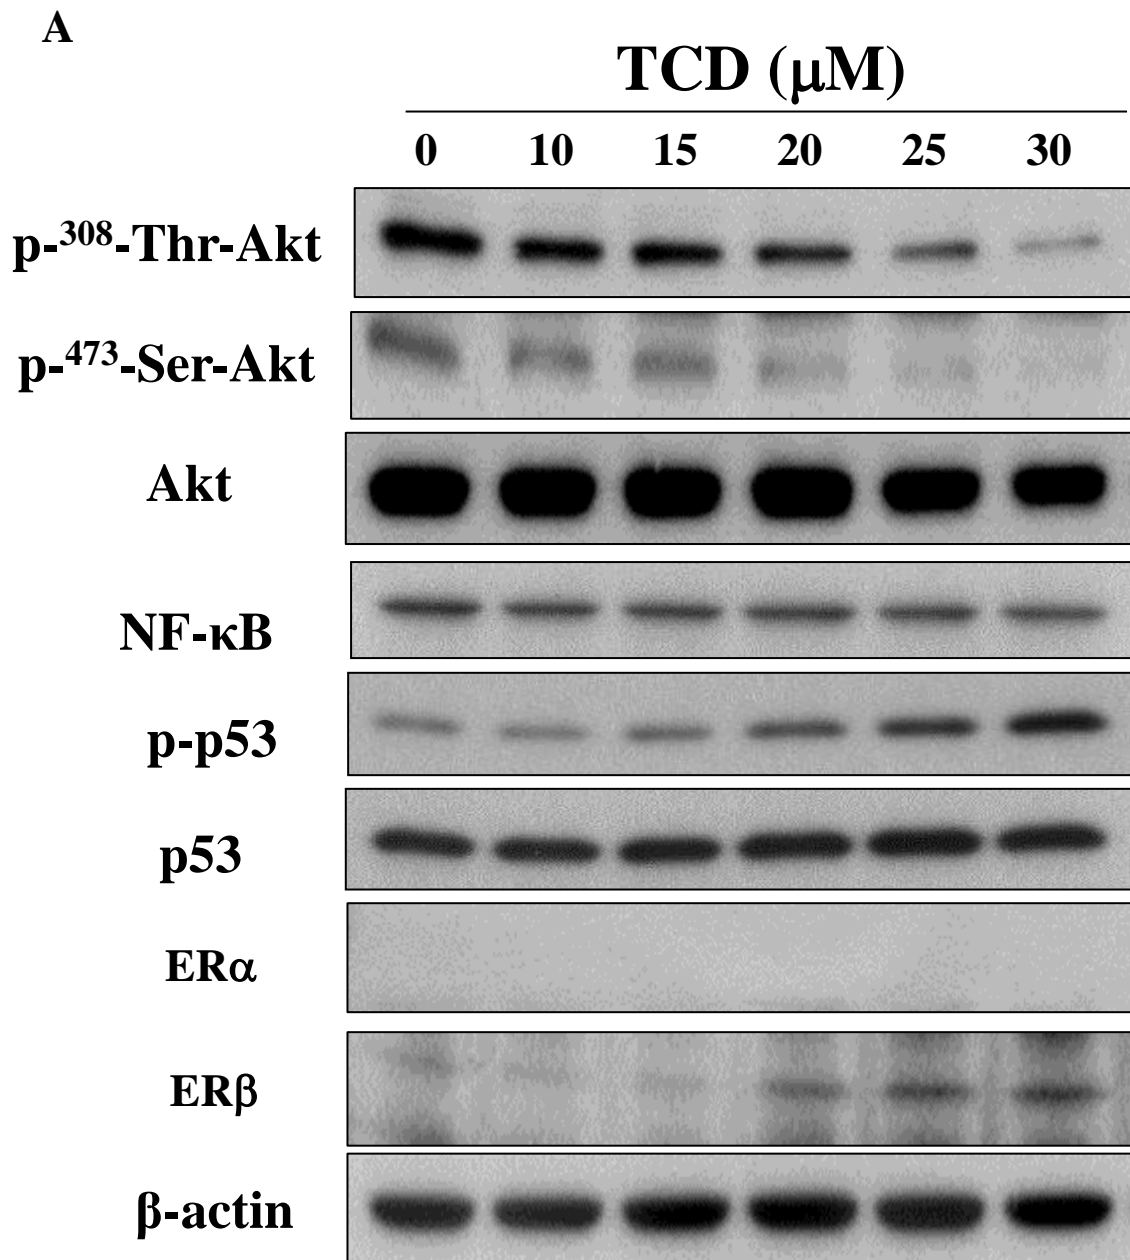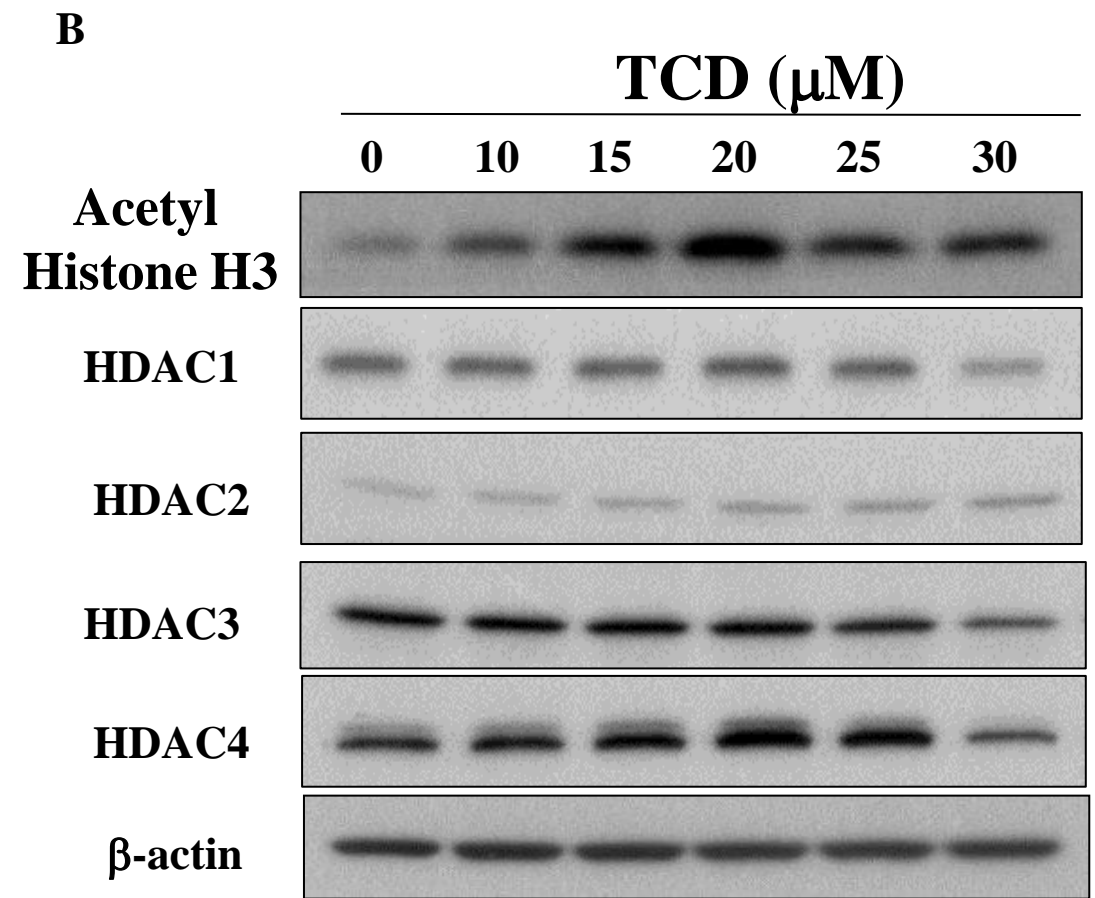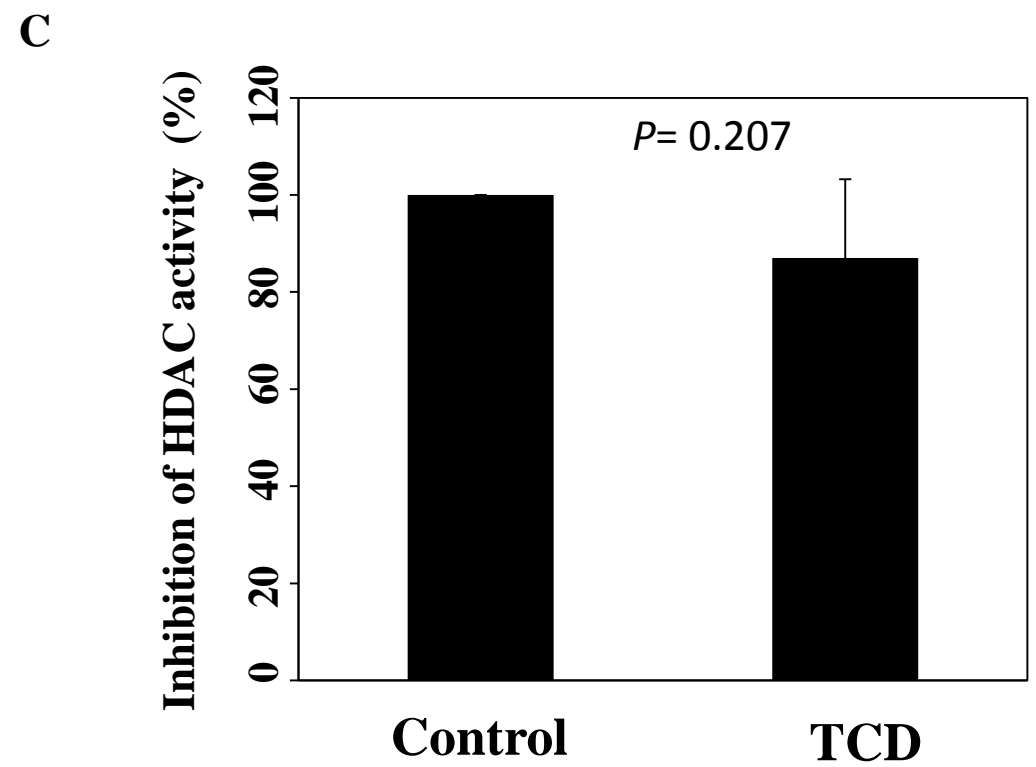

**Fig. S3**

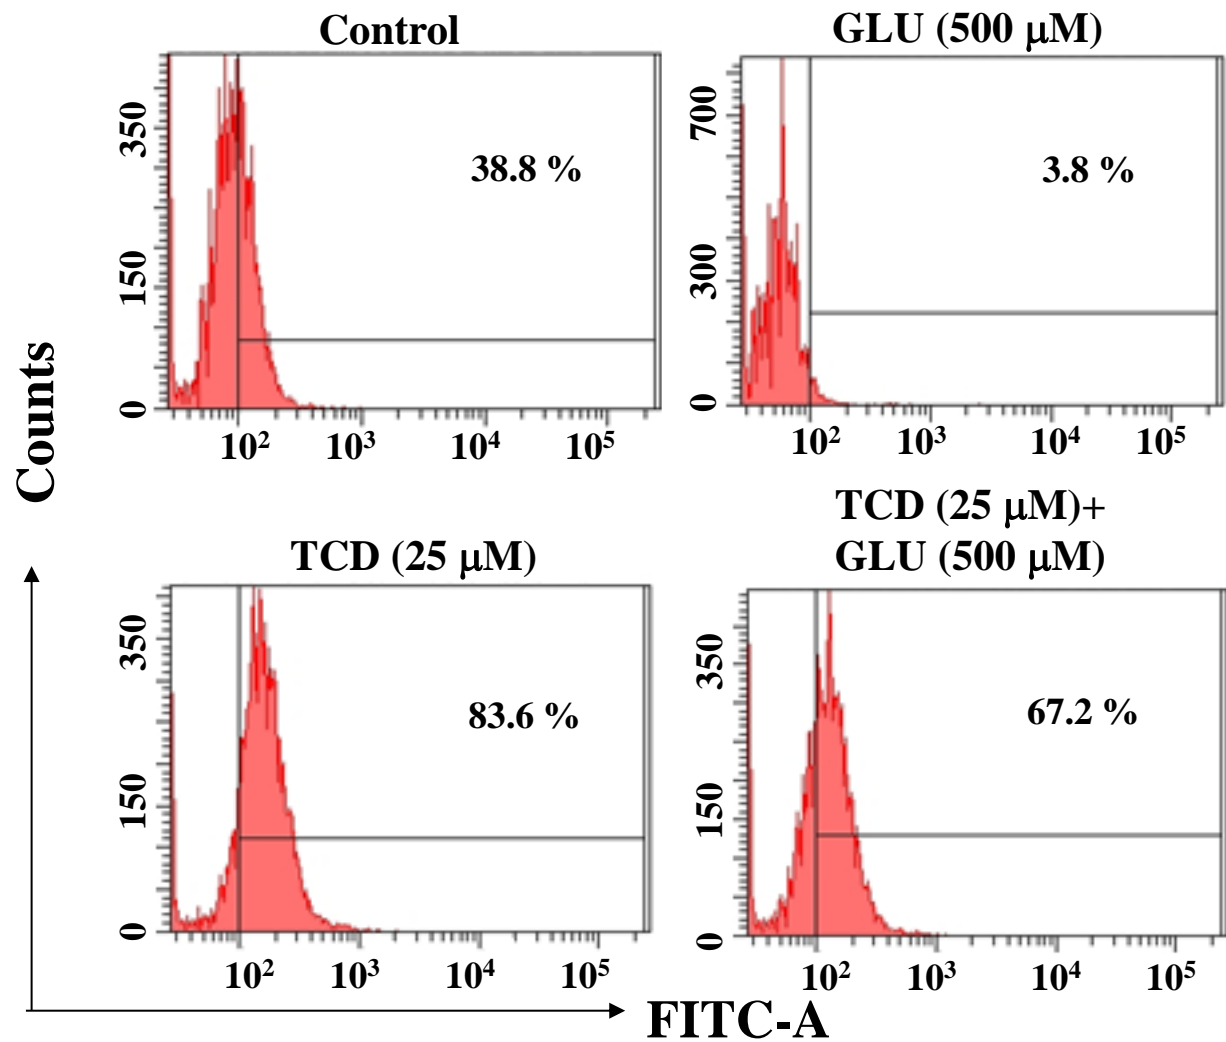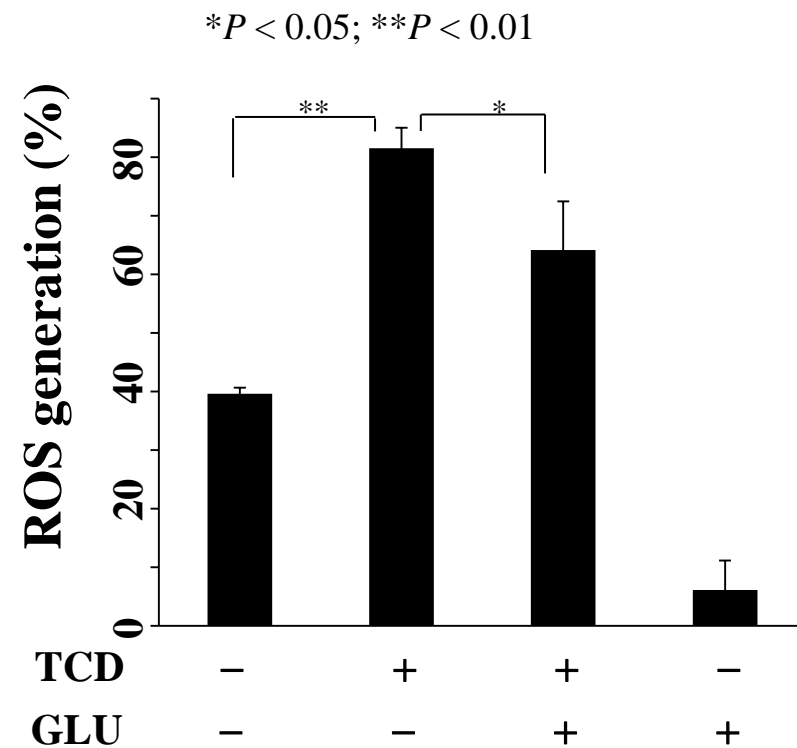

Supplement: srep22419-s1.pdf [file srep22419-s1.pdf]
